# Supplementary material
Source: PubMed Central journal article supplement (PMC3528531)
Supplement: 1206970109_pnas.201206970SI.pdf [file 1206970109_pnas.201206970SI.pdf]

# Supporting Information

Bessa et al. 10.1073/pnas.1206970109

## SI Materials and Methods

**Mice and Antigens.** To evaluate the Ab response induced by Q $\beta$ -virus-like particles (VLP), female, 8-wk-old C57BL/6 mice (Harlan) were immunized either intranasally or subcutaneously with 50  $\mu$ g of VLP containing *Escherichia coli*-derived ssRNA. TgH(VI10)xYEN mice (1) were bred and maintained at Bio-Support, Zürich. All animal experiments were conducted in accordance with protocols approved by the Swiss Federal Veterinary Office. Q $\beta$ -VLPs and AP205 were purified as described elsewhere (2).

**Immunization and Pertussis Toxin Treatment.** For the intranasal immunization with VLPs, mice were anesthetized with isoflurane and vaccine was administered using a 200- $\mu$ L pipette. Subcutaneous vaccination was performed by VLP injection into both sides of the abdomen. For both routes of immunization, VLP was diluted in PBS to a final administration volume of 100  $\mu$ L (2 $\times$  50  $\mu$ L). Mice received pertussis toxin (PTX; 400  $\mu$ g/kg) intravenously 4 h before intranasal VLP administration.

**Lung Cell Isolation.** For the isolation of lymphocytes from the lung, mice were perfused with 5 mL of PBS in the heart ventricle to clear lungs of blood. Lungs were chopped in small pieces and incubated at 37 °C in media containing collagenase. Finally, lymphocytes were harvested by using a 30% (vol/vol) percoll gradient.

**ELISA.** For determination of VLP-specific IgG titers, ELISA plates (Nunc Immuno MaxiSorp) were coated overnight with VLPs (1  $\mu$ g/mL) and ELISA were performed according to standard protocols using HPRO-conjugated goat anti-mouse IgG (Fc  $\gamma$ -specific; Jackson Immunoresearch). Anti-VLP IgG titers in serum are indicated as dilutions reaching half-maximal absorbance at 450 nm.

For determination of free VLP in serum, ELISA plates (Nunc Immuno MaxiSorp) were coated overnight with 100  $\mu$ L of anti-Q $\beta$ -VLP monoclonal Ab (1.5  $\mu$ g/mL) and quantification of free VLP in serum was determined using biotinylated anti-VLP monoclonal Ab following HPRO-conjugated streptavidin (Jackson Immunoresearch). Optical densities were read in the ELISA reader at 450 nm.

For the detection of allotype-specific antibodies, a mixture of biotin-labeled rat anti-mouse IgG1<sup>a</sup> and IgG2a<sup>a</sup> or IgG1<sup>b</sup> and IgG2a<sup>b</sup> (BD Pharmingen) was used followed by streptavidin-HPRO (Jackson Immunoresearch).

**ELISPOT Assay.** VLP-specific antibody-forming cell (AFC) frequencies were determined as previously described (3). Briefly, 24-well plates were coated with 10  $\mu$ g/mL VLPs. Splenocytes were added in DMEM containing 2% FCS and incubated for 5 h at 37 °C. Cells were washed off and plates were incubated either with goat anti-mouse IgG (EY Labs), followed by alkaline phosphatase-conjugated donkey anti-goat IgG Ab (Jackson Immunoresearch) before development of alkaline phosphatase color reactions.

**Flow Cytometry.** Detection of VLP-specific B cells expressing surface Ig was performed by incubation with Alexa 647-conjugated VLP particles. Donor versus host cells were distinguished with a FITC-conjugated anti-CD45.1 (1/300; mouse anti-mouse). Isotype-switched B cells were detected with a mixture of PE-conjugated antibodies at 1/500 dilution [rat anti-IgD, goat anti-IgM serum (Jackson Immunoresearch); hamster anti-CD3, rat anti-CD4, rat anti-CD8, hamster anti-CD11c, rat anti-CD11b, rat anti-Gr-1, and PerCP-Cy5.5-conjugated rat IgG2a anti-CD19 (1/400; 1D3)]. CD62L expression on blood B cells was detected with PE-conjugated rat anti-mouse CD62L. In all cases, Fc-receptors were blocked

with rat IgG2b anti-mouse CD16/32 (1/100; 2.4G2). Antibodies were purchased from BD Biosciences, unless otherwise specified.

For detecting cells in association with VLPs in the blood, mice were immunized either intranasally or subcutaneously with 100  $\mu$ g of VLP labeled with Alexa-488. Four hours after immunization, mice were killed and blood-cells were stained with antigen-presenting cell-conjugated rat anti-mouse CD19 (BD Pharmingen; 1/400). Fc-receptors were blocked with rat IgG2b anti-mouse CD16/32 (1/100; 2.4G2) and dead cells were excluded by propidium iodide staining.

The B cells expressing VSV-specific BCR were detected by a monoclonal Ab (clone 35.61) recognizing VI10 heavy and light chains (1).

**Immunofluorescence.** Freshly removed spleens were immersed in OCT and snap-frozen in liquid nitrogen. Tissue sections of 7- $\mu$ m thickness were cut in a cryostat and fixed with acetone. For detection of VLP-specific B cells, first unlabeled VLPs were added, followed by a polyclonal rabbit anti-VLP antiserum (1/1,500; RCC) and detected with Alexa 488-conjugated goat anti-rabbit Ab (1/1,000). PNA-binding B cells were detected with biotinylated PNA (1/800; Vector Laboratories), followed by Alexa 546-labeled Streptavidin (1/1,000). VLPs were detected by incubating sections with rabbit anti-VLP antiserum (1/1,500; produced by RCC), followed by Alexa 488-conjugated goat anti-rabbit Ab (1/1,000; Molecular Probes). B-cell follicles were identified with Alexa 647 rat anti-mouse B220 (1/200; BD Pharmingen). Lungs were prepared the same way as the spleen, except that they were perfused with 300  $\mu$ L of OCT prior removal and the sections were 10- $\mu$ m thick. B cells were detected with unlabeled rat anti-mouse CD19 (1/50; BD Pharmingen), followed by Alexa 546-conjugated goat anti-rat Ab (1/200; Invitrogen). Blood vessels were visualized with Alexa 647-conjugated rat anti-mouse CD31 (1/200; Biolegend). Images were acquired with Axioplan 2 microscope (Zeiss) and pictures were analyzed with Open laboratory software (Improvision).

**Immunohistochemistry.** Freshly removed spleens were immersed in OCT and snap-frozen in liquid nitrogen. Tissue sections of 7- $\mu$ m thickness were cut in a cryostat and fixed with acetone. For detection of VLPs, sections were incubated with rabbit anti-VLP antiserum, followed by alkaline phosphatase-labeled goat antibodies to rabbit immunoglobulins (Jackson Immunoresearch) and alkaline phosphatase-labeled donkey antibodies against goat immunoglobulins (Jackson Immunoresearch) (diluted 1/80). Alkaline phosphatase was visualized using Fast Blue substrate Kit III (Vector Laboratories), which yielded a blue precipitate. Red pulp was distinguished from white pulp using Nuclear Fast Red solution (Vector Laboratories).

**Radiation Bone-Marrow Chimeras.** Radiation bone-marrow chimeras holding vesicular stomatitis virus-specific B cells as well as polyclonal B cells and natural antibodies were generated by intravenous injection of bone-marrow mixture containing 20% of bone-marrow cells isolated from C57BL/6 Ly5.1 mice and 80% of bone-marrow cells isolated from (VI10)xYEN mice into C57BL/6 Ly5.2 mice that had been lethally irradiated (950 rad  $\gamma$ ) 1 d before. Prior to cell transfer, bone-marrow cell suspension was depleted from T cells. After 6 wk, bone-marrow reconstitution was assessed by staining peripheral blood lymphocytes. Thereafter, mice were immunized with 100  $\mu$ g of VLP intranasally.

**Purification and Adoptive Transfer of Lung B Cells.** Leukocytes isolated from the lung were incubated with anti-CD19 MACS microbeads (Miltenyi Biotec) and B cells were positively selected

through LS MACS separation columns according to the manufacturer's instructions. Purity of CD19<sup>+</sup> B cells was ~90%. Cells were extensively washed with PBS at 4 °C, resuspended in 100 µL

of PBS, and injected into the tail vein of a sex-matched recipient. After 10 d, recipient mice were bled for determination of VLP-specific IgG titers.

1. Hangartner L, et al. (2003) Antiviral immune responses in gene-targeted mice expressing the immunoglobulin heavy chain of virus-neutralizing antibodies. *Proc Natl Acad Sci USA* 100(22):12883–12888.
2. Cielens I, et al. (2000) Mutilation of RNA phage Qbeta virus-like particles: From icosahedrons to rods. *FEBS Lett* 482(3):261–264.

3. Gatto D, et al. (2005) Complement receptors regulate differentiation of bone marrow plasma cell precursors expressing transcription factors Blimp-1 and XBP-1. *J Exp Med* 201(6):993–1005.

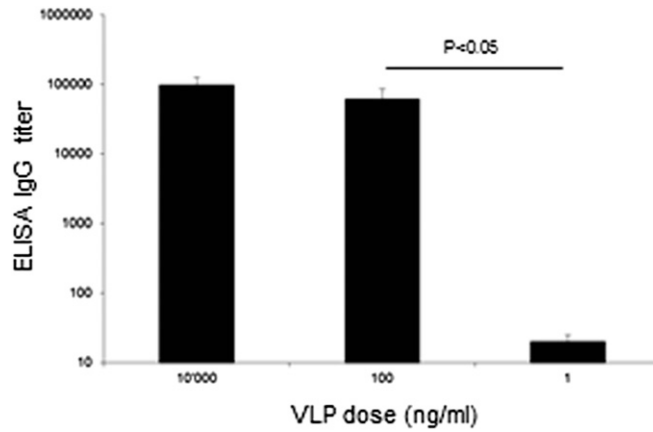

**Fig. S1.** Low dose of VLPs fails to be immunogenic. C57BL/6 mice were injected intravenously with the indicated dose of VLPs. VLP-specific IgG titers were determined 10 d later by ELISA ( $n = 3$ ).  $P$  value was calculated by Student  $t$  test (two-tailed, unpaired).

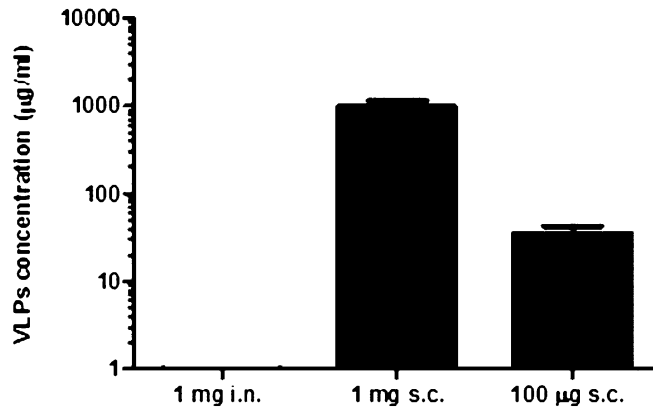

**Fig. S2.** Quantification of free VLPs in blood after intranasal administration with 1 mg of VLPs. C57BL/6 mice were immunized intranasally with 1 mg of VLPs or subcutaneously with 1 mg or 100 µg of VLPs. Levels of circulating VLPs were determined 7 h later in blood by ELISA.

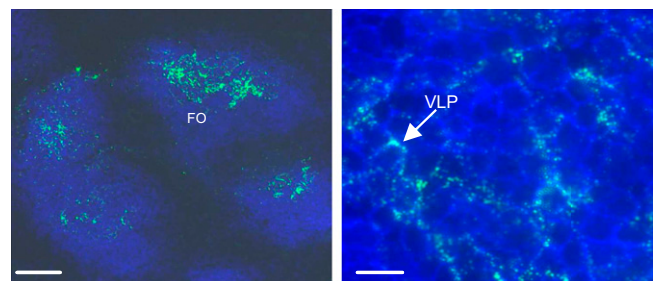

**Fig. S3.** B cells within the B-cell follicles are associated with VLPs 24 h postintranasal immunization. Histological detection of VLPs on B cells within the splenic follicles 24 h after intranasal administration of 1 mg of VLPs. Blue, B220 staining B cells; green, Alexa 488-conjugated VLPs. Images were made at lower (Left scale bar, 100 µm) or higher magnification (Right scale bar, 5 µm).

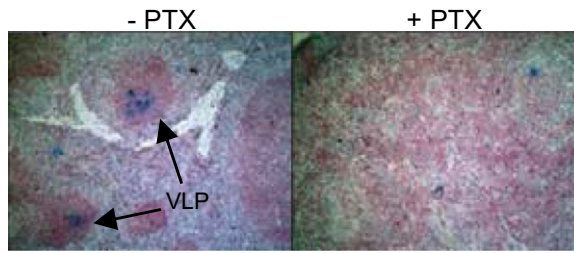

**Fig. S4.** Mice treated with PTX failed to trap VLPs into splenic follicles. Histological detection of VLPs within splenic B-cell follicles of PTX-treated mice 24 h after intranasal administration of 1 mg of VLPs. Spleen section of untreated mice is shown as control. (Original magnification: 20x.)

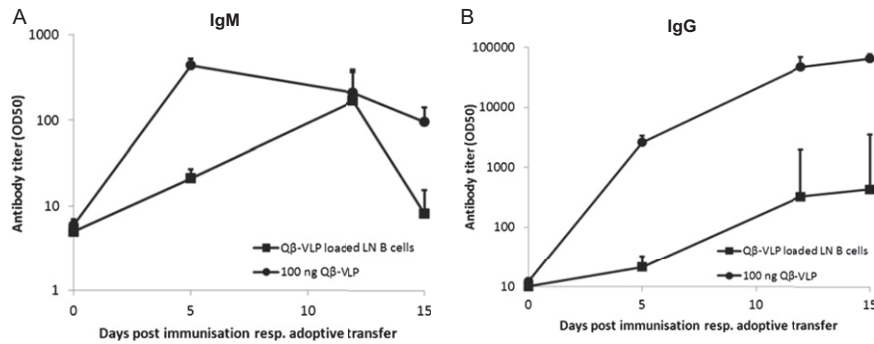

**Fig. S5.** Induction of humoral response after adoptive transfer of Qβ-VLP loaded B220<sup>+</sup> lymph node cells. C57/BL6 mice ( $n = 3$ ) received  $8 \times 10^5$  MACS-purified B220<sup>+</sup> B cells isolated from lymph nodes (0.13% binding Qβ-VLP) that were loaded with 10 μg/mL Qβ-VLP for 30 min *in vitro*. After the adoptive transfer, mice were bled over time and sera were analyzed for Qβ-VLP specific IgM (A) or IgG (B) antibodies.

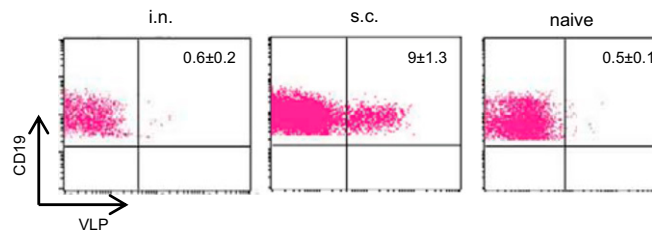

**Fig. S6.** Intranasal immunization fails to induce B-cell response in nondraining lymph nodes. Mice were immunized intranasally or subcutaneously with 50 μg of VLPs and the frequency of VLP-specific memory B cells in inguinal lymph nodes was assessed 30 d postimmunization. Analysis was performed by gating on isotype-switched B cells (CD19<sup>+</sup>, IgM, IgD, CD4, CD8, CD11b, and Gr-1<sup>-</sup>). Mean percentages ± 1 SD of VLP-specific B cells are shown ( $n = 3$ ).

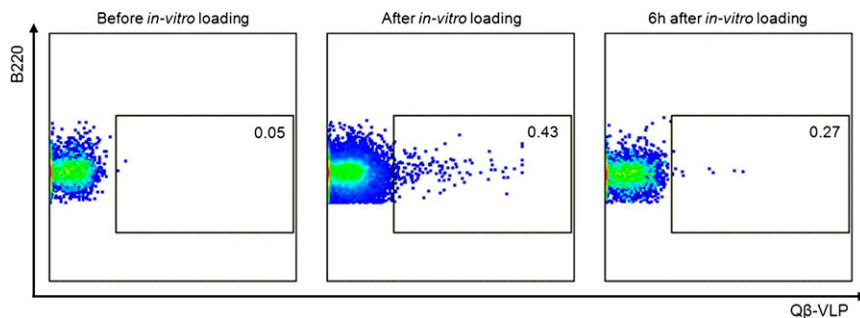

**Fig. S7.** The release of Qβ-VLPs bound to lung B cells upon *in-vitro* loading. Lung B220<sup>+</sup> B cells were isolated from C57/BL6 mice ( $n = 3$ ). MACS purified B cells were loaded with 10 μg/mL Qβ-VLPs for 30 min *in vitro*. Cells were analyzed by flow cytometry for the proportion of Qβ-VLP<sup>+</sup> B cells (Right) and 6 h after *in vitro* loading with VLPs.

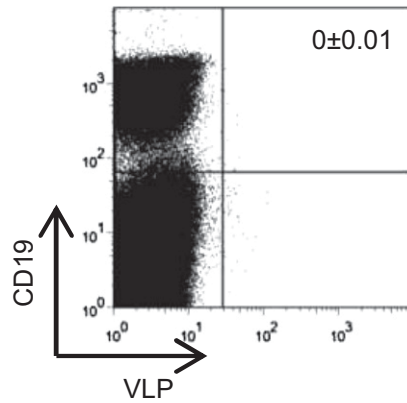

**Fig. S8.** Sera from WT mice into (VI10)xYEN mice fail to restore the ability of VLP binding into B cells. (VI10)xYEN mice received 200  $\mu$ L of sera from naïve WT mice intravenously 16 h prior to intranasal immunization with 100  $\mu$ g of Alexa 488-conjugated VLPs. Analysis of interaction with VLP in blood was determined 4 h later by flow cytometry. Mean percentage  $\pm$  1 SD of VLP-binding B cells is indicated ( $n = 3$ ).

**Table S1. Summary of frequency of cells binding intermediate and high amounts of VLPs in blood of WT,  $Fc\gamma RIIB^{-/-}$ ,  $Cr2^{-/-}$ , and (VI10)xYEN mice**

| VLP                 | WT             | $Fc\gamma RIIB^{-/-}$ | $Cr2^{-/-}$     | (VI10)xYEN     |
|---------------------|----------------|-----------------------|-----------------|----------------|
| VLP <sup>int</sup>  | $0.1 \pm 0.04$ | $0.21 \pm 0.07$       | $0.16 \pm 0.08$ | $0.02 \pm 0.0$ |
| VLP <sup>high</sup> | $0.01 \pm 0.0$ | $0.01 \pm 0.05$       | $0.08 \pm 0.0$  | $0.0 \pm 0.0$  |

Analysis was performed 4 h after intranasal administration of 100  $\mu$ g Alexa 488-conjugated VLPs. Mean values  $\pm$  SEM ( $n = 4$ ) are given.
